# Supplementary material for: Optimization of Sentinel Lymph Node Imaging Methodology Using Anionic Liposome and Hyaluronidase
Source: MDPI journal article supplement (doi:10.3390/pharmaceutics13091462), 2021-09-14
Supplement: s1 [file s1]

## Supplementary Materials:

# Optimization of anionic liposome with hyaluronidase for sentinel lymph node imaging

Yu Sakurai, Miho Suzuoki, Masaki Gomi, Hiroki Tanaka and Hidetaka Akita

Table S1. Summary of DoE results.

| Factors             | Sum of Square | Freedom | Variance | F-value | P-value | Significance |
|---------------------|---------------|---------|----------|---------|---------|--------------|
| M                   | 89.12         | 1       | 89.12    |         |         |              |
| Phospholipid X1     | 9.900         | 1       | 9.90     | 48.20   | 0.0023  | **           |
| Cholesterol X2      | 1.72          | 1       | 1.72     | 8.38    | 0.0443  | *            |
| PEG amount X3       | 2.32          | 1       | 2.32     | 11.30   | 0.0283  | *            |
| Filter pore size X4 | 0.13          | 1       | 0.13     | 0.63    | 0.4704  |              |
| HAase X5            | 18.96         | 1       | 18.96    | 92.30   | 0.0007  | **           |
| X2 X3               | 1.49          | 1       | 1.49     | 7.26    | 0.0543  |              |
| X1 X4               | 2.51          | 1       | 2.52     | 12.24   | 0.0249  | *            |
| X2 X4               | 0.97          | 1       | 0.97     | 4.74    | 0.0951  |              |
| X3 X5               | 1.52          | 1       | 1.53     | 7.44    | 0.0526  |              |
| X2 X5               | 5.58          | 1       | 5.58     | 27.15   | 0.0065  | **           |
| X1 X5               | 4.43          | 1       | 4.43     | 21.57   | 0.0097  | **           |
| Residual            | 0.82          | 4       | 0.21     |         |         |              |
| Total               | 139.49        | 16      |          |         |         |              |

\*  $p < 0.05$ ; \*\*  $p < 0.001$ .
